# Supplementary material for: The total synthesis of alkaloids (–)-histrionicotoxin 259A, 285C and 285EAll new compounds exhibited satisfactory spectroscopic and analytical and/or exact mass data. Electronic supplementary information (ESI) available: experimental procedures for the preparation of compounds 4, 5, 13, 16, 22 and 25. See http://www.rsc.org/suppdata/cc/b1/b111514f/
Source: Royal Society of Chemistry journal article supplement (doi:10.1039/b111514f), 2002-05-03
Supplement: b111514f.doc [file b111514f.doc]

The total synthesis of alkaloids (–)-histrionicotoxin 259A, 285C and 285E

Supplementary data

Catherine J. Smith, Andrew B. Holmes and Neil J. Press

(–)-Histrionicotoxin 285C, 4.

16,20-Bis(trimethylsilyl)histrionicotoxin **285C** (5.0 mg, 0.012 mmol) was dissolved in dry methanol (5 cm3) and potassium carbonate (32 mg, 0.23 mmol, 20 eq) was added in one portion. After vigorous stirring at 25 °C for 17 h, the solvent was removed *in vacuo* to virtual dryness and the residue was taken up in EtOAc (2 cm3) and water (2 cm3) was added. The aqueous layer was separated and extracted further with EtOAc (2  2 cm3) and the organic phases washed with brine (2  2 cm3). The combined organic phases were dried (MgSO4) and concentrated *in vacuo.* Purification of the crude residue *via* flash column chromatography (1:9 MeOH:CH2Cl2) yielded *(–)-histrionicotoxin* ***285C*** **4** as a colourless oil (2.9 mg, 88%);R*f* 0.18 (9:1 CH2Cl2:MeOH); -43.3 (*c* 0.12 in CHCl3); *v*max(thin film)/cm-1 3301s (C-H), 3218brs (O-H), 2935s (C-H), 2125w (CC), 2092w (CC), 1665m, 1553m, 1452m, 1261m, 1097m and 961m; **H(500 MHz; CDCl3) 5.84 (1 H, dd, *J* 10.5 and 10.0, *H*-17), 5.61 (1 H, d, *J* 10.5, *H*-18), 3.96 (1 H, br s, C*H*OH), 3.71 (1 H, d, *J* 10.0, C*H*CH=CH), 3.21 (1 H, s, *H*-20), 3.17 (1 H, br m, C*H*NH), 2.24 (2 H, br m, C*H*2), 2.08 (1 H, br m, C*H*), 1.96 (1 H, s, *H*-16) and 1.82-1.13 (15 H, m, 7  C*H*2 and C*H*); *m/z* (ES) 286.2180 [(M+H)+.C19H28NO requires *M*, 286.2171]; *m/z* (CI) 286 [(M+H)+, 100%] and 52 (67).

(–)-Histrionicotoxin 285C Hydrochloride, 4·HCl.

(–)-Histrionicotoxin **285C** **4** (2.5 mg, 0.009 mmol) was dissolved in dry methanol (1 cm3) and methanolic HCl (0.3 M; 44 L, 1.5 eq) was added. After stirring for 0.5 h, the solvent was removed *in vacuo* furnishing *(–)-histrionicotoxin* ***285C*** *hydrochloride* **6.186** as a colourless oil which slowly crystallised on standing at -20 °C (2.5 mg, 88%); mp 244.5-246.5 °C (lit.1 247-250 °C); R*f* 0.15 (9:1 CH2Cl2:MeOH); -44.6 (*c* 0.12 in EtOH) {lit.2 -43.4 (*c* 1.18 in EtOH)}; **H(500 MHz; MeOD) 6.00 (1 H, dd, *J* 10.5 and 10.0, *H*-17), 5.78 (1 H, dd, *J* 10.5 and 2.0, *H*-18), 4.01 (1 H, s, C*H*OH), 3.79 (1 H, m, *H*-7), 3.79 (1 H, d, *J* 2.0, *H*-20), 3.63 (2 H, m, N*H2*), 3.54-3.45 (1 H, m, C*H*NH), 2.30-2.27 (3 H, m, C*H*2 and *H*-16), 2.05-1.94 (3 H, m, C*H*2 and C*H*), 1.81-1.62 (9 H, m, 4  C*H*2 and C*H*) and 1.35-1.26 (4 H, m, 2  C*H*2); **C(100 MHz; MeOD) 137.9, 112.7, 84.5, 82.5, 78.6, 72.2, 69.1, 60.8, 60.0, 52.3, 40.8, 33.8, 32.8, 32.3, 28.1, 26.9, 23.8, 17.4 and 14.0; *m/z* (ES) 286.2169 {[(M-HCl)+H]+.C19H28NO requires *M*, 286.2171}; *m/z* (CI) 286 {[(M-HCl)+H]+, 100%}and 268 (33).

(2*S*, 6*R*, 7*S*, 8*S,* 1'*S*)-(1"*Z*)-2-(5'-Trimethylsilyl-1'-hydroxypent-4'-ynyl)-7-(4''-trimethylsilyl-but-1''-en-3''-yn-1''-yl)-1-aza-12-oxatricyclo[5.4.16,8.0]undecane, 16 *S*.

and

(2*S*, 6*R*, 7*S*, 8*S,* 1'*R*)-(1"*Z*)-2-(5'-Trimethylsilyl-1'-hydroxypent-4'-ynyl)-7-(4''-trimethylsilyl-but-1''-en-3''-yn-1''-yl)-1-aza-12-oxatricyclo[5.4.16,8.0]undecane, 16 *R*.

Magnesium turnings (11.3 mg, 0.47 mmol, 15 eq) were placed in a two-necked round-bottomed flask equipped with a reflux condenser and a suba seal. The flask was evacuated and refilled with nitrogen (3 cycles) before being charged with THF (0.5 cm3). Dibromoethane (1 drop) was added and the reaction mixture was observed to warm, indicating that the reaction had been initiated. A solution of trimethylsilyl butynyl bromide (32.3 mg, 0.15 mmol, 5 eq) in THF (1.5 cm3) was added dropwise *via* cannula over a period of 0.25 h followed by stirring at 40 °C for 0.5 h, after which time a pale yellow solution of the Grignard reagent was observed to have formed.

The precipitated salts from the Grignard reagent were allowed to settle and the clear solution (1 cm3, ≈2.5 eq) was added dropwise *via* cannula to a solution of the aldehyde **15** (10.0 mg, 0.031 mmol) in THF (1.0 cm3) and the reaction vessel was stirred at 25 °C for 5 minutes. The reaction mixture was quenched by the addition of NH4Cl (2 cm3) and extracted into EtOAc (3  4 cm3). The combined organic phases were dried (MgSO4), concentrated *in vacuo* and purified *via* flash column chromatography (3:1 hexane:ether; 1% NEt3) to yield the *alcohol* **16 *S*** (8.4 mg, 60%) as a colourless oil; R*f* 0.45 (1:1 hexane:ether); +8.4 (*c* 0.28 in CHCl3); *v*max(thin film)/cm-1 3423brs (O-H), 2954s (C-H), 2860m (C-H), 2173m (CC), 1448w, 1249s (SiMe3), 1081m, 1009m, 842s (SiMe3) and 759m (*cis* HC=CH); **H(500 MHz; CDCl3) 6.03 (1 H, dd, *J* 10.5 and 10.0, C*H*=CHCC), 5.73 (1 H, d, *J* 10.5, CH=C*H*CC), 4.53 (1 H, dd, *J* 6.5, 5.5 and 0.0, C*H*O), 3.82 (1 H, dd, *J* 10.0 and 6.5, C*H*CH=CH), 3.77 (1 H, br d, *J* 4.0, O*H*), 3.67 (1 H, dddd, *J* 4.0, 4.0, 4.0 and 0.0, C*H*OH), 2.82 (1 H, ddd, *J* 12.5, 4.0 and 4.0, C*H*N), 2.41 (2 H, m, C*H*2), 1.82-1.46 (10 H, m, 5  C*H*2), 1.38-1.30 (3 H, m, C*H*2 and C*H*), 0.21 (9 H, s, Si(C*H*3)3) and 0.14 (9 H, s, Si(C*H*3)3); **C(63 MHz, APT; CDCl3) 138.7 (d), 113.4 (d), 107.9 (s), 101.8 (s), 100.2 (s), 84.3 (s), 77.9 (d), 74.3 (d), 67.1 (d), 66.2 (s), 47.2 (d), 34.6 (t), 34.2 (t), 32.2 (t), 27.9 (t), 25.2 (t), 19.2 (t), 17.9 (t), 16.7 (t), 0.2 (q) and -0.1 (q); *m/z* (ES) 444.2755 [(M+H)+.C25H42NO2Si2 requires *M*, 444.2754]; *m/z* (CI) 444 [(M+H)+, 63%], 290 (100), 249 (12), 221 (20), 172 (18), 155 (11) and 90 (13).Further elution of the column yielded the diastereomeric*alcohol* **16 *R*** (4.6 mg, 33%)also as a colourless oil; R*f* 0.23 (1:1 hexane:ether); +7.5 (*c* 0.22 in CHCl3); *v*max(thin film)/cm-1 3469brs (O-H), 2954s (C-H), 2860m (C-H), 2174w (CC), 2170w (CC), 1449m, 1249s (SiMe3), 1089w, 842s (SiMe3) and 758m (*cis* HC=CH); **H(500 MHz; CDCl3) 6.05 (1 H, dd, *J* 10.5 and 10.0, C*H*=CHCC), 5.73 (1 H, d, *J* 10.5, CH=C*H*CC), 4.50 (1 H, ddd, *J* 6.5, 5.5 and 0.0, C*H*O), 3.95 (1 H, ddd, *J* 9.5, 5.0 and 2.5, C*H*OH), 3.83 (1 H, dd, *J* 10.0 and 6.5, C*H*CH=CH), 3.31 (1 H, d, *J* 1.5, O*H*), 2.80 (1 H, ddd, *J* 12.0, 2.5 and 2.5, C*H*N), 2.53 (1 H, ddd, *J* 17.0, 9.5 and 5.0, C*H*), 2.35 (1 H, m, C*H*), 2.01-1.94 (1 H, m, C*H*), 1.84-1.25 (13 H, m, 6  C*H*2 and C*H*), 0.21 (9 H, s, Si(C*H*3)3) and 0.15 (9 H, s, Si(C*H*3)3); **C(100 MHz; CDCl3) 138.8, 113.4, 107.6, 101.8, 100.1, 84.2, 77.6, 70.0, 67.7, 65.7, 46.9, 34.7, 32.1, 31.7, 25.3, 23.6, 19.2, 17.9, 17.3, 0.2 and -0.1; *m/z* (ES)444.2754 [(M+H)+.C25H42NO2Si2 requires *M*, 444.2754]; *m/z* (CI) 444 [(M+H)+, 33%], 290 (52), 222 (24), 172 (80), 155 (72) and 90 (100). The assignment of the stereochemistry of the 1'-hydroxy functionality is tentative and based on observed coupling constants in the 1H NMR spectra.

(–)-Histrionicotoxin 285E, 5.

Triisopropylsilylhistrionicotoxin **285E** (5.2 mg, 0.012 mmol) was dissolved in THF (2.5 cm3) and TBAF (1.0 M in THF; 24 L, 0.024 mmol, 2 eq) was added with stirring. After the reaction mixture was stirred at 25 °C for 1 h the reaction was deemed complete by TLC analysis. The reaction mixture was concentrated under a stream of nitrogen and purified *via* flash column chromatography (1:9 MeOH:CH2Cl2) to furnish *(–)-histrionicotoxin* ***285E* 5** (2.8 mg, 84%)as a colourless oil; R*f* 0.57 (3:1 CH2Cl2:MeOH) [lit.3 0.52 (9:1:0.08 CH3Cl:*i*PrOH:aq. NH3)]; -23.8 (*c* 0.08 in CHCl3); *v*max(thin film)/cm-1 3350-2400brs (O-H or N-H), 3299m (C-H), 2931s (C-H), 2848s (C-H), 2092w (CC), 1728m, 1556m, 1454m, 1260s, 1092s, 1018s, 912m (=CH2), 798s (*cis* CH=CH) and 757s (*cis* CH=CH); **H(500 MHz; CDCl3) 6.73 (1 H, ddd, *J* 16.5, 10.5 and 10.5, *H*-15), 6.16 (1 H, dd, *J* 11.0 and 10.5, *H*-14), 5.83 (1 H, dd, *J* 11.0 and 10.5, *H*-17), 5.61 (1 H, dd, *J* 11.0 and 2.0, *H*-18), 5.46 (1 H, dt, *J* 11.0 and 8.0, *H*-13), 5.24 (1 H, d, *J* 16.5, *H*-16 *trans*), 5.18 (1 H, d, *J* 10.5, *H*-16 *cis*), 3.96 (1 H, br m, C*H*OH), 3.71 (1 H, br d, *J* 10.5, *H*-7), 3.22 (2 H, br m, C*H*NH and *H*-20), 2.52 (2 H, br m, 2  *H*-12), 2.04 (1 H, br m, C*H*), 1.79 (2 H, br t, *J* 12.0, C*H*2) and 1.69-1.20 (9 H, m, 4  C*H*2 and C*H*); *m/z* (ES) 286.2169 [(M+H)+.C19H28NO requires *M*, 286.2171]; *m/z* (CI) 286 [(M+H)+, 15%], 180 (87), 154 (100), 115 (82) and 98 (92).

**(–)-Histrionicotoxin 285E Hydrochloride, 5·HCl.**

(–)-Histrionicotoxin **285E** **5** (2.0 mg, 0.007 mmol) was dissolved in dry methanol (1 cm3) and methanolic HCl (0.3 M; 35 L, 0.011 mmol, 1.5 eq) was added. After the solution was stirred for 1 h, the solvent was removed *in vacuo* to furnish *(–)-histrionicotoxin* ***285E*** *hydrochloride* **5.72** as a colourless oil which slowly crystallised on standing (1.9 mg, 84%); mp 231-235 °C; R*f* 0.28 (9:1 CH2Cl2:MeOH); -38.5 (*c* 0.18 in EtOH) {lit.4 -122 (*c* 1.0 in EtOH)}; **H(500 MHz; MeOH) 6.72 (1 H, ddd, *J* 16.5, 11.0 and 10.5, *H*-15), 6.27 (1 H, dd, *J* 11.0 and 10.0, *H*-14), 6.00 (1 H, dd, *J* 11.0 and 10.5, *H*-17), 5.61 (1 H, dd, *J* 11.0 and 2.0, *H*-18), 5.45 (1 H, dt, *J* 11.0 and 8.0, *H*-13), 5.33 (1 H, d, *J* 16.5, *H*-16 *trans*), 5.25 (1 H, d, *J* 10.5, *H*-16 *cis*), 3.99 (1 H, br d, C*H*OH), 3.78 (2 H, m, *H*-7 and *H*-20), 3.56-3.50 (1 H, m, C*H*NH), 2.65 (1 H, m, *H*-12), 2.50 (1 H, m, *H*-12), 2.04-1.85 (3 H, m, C*H*2 and C*H*), 1.75-1.65 (6 H, m, 3  C*H*2) and 1.42-1.26 (3 H, m, C*H*2 and C*H*); **C(100 MHz; MeOH) 137.8, 133.5, 131.1, 124.1, 118.8, 112.7, 84.5, 78.6, 70.0, 60.1, 52.5, 40.8, 33.7, 32.3, 31.8, 28.0, 26.9, 17.5 and 14.0; *m/z* (ESI) 286.2161 {[(M-HCl)+H]+.C19H28NO requires *M*, 286.2171}, 286 {[(M-HCl)+H]+, 100%}.

(2*S*, 6*R*, 7*S*, 8*S*)-(2'*Z*, 1"*Z*)-2-(Penta-2',4'-dienyl)-7-(4''-triisopropylsilyl-but-1''-en-3''-yn-1''-yl)-1-aza-12-oxatricyclo[5.4.16,8.0]undecane, 13.

PdCl2(MeCN)2 (2 mg, cat.) was dissolved in dry DMF (0.4 cm3) under nitrogen and the mixture was stirred. A solution of the vinyl iodide **12** (10.4 mg, 0.019 mmol) in dry DMF (0.4 cm3) was added dropwise, followed by a solution of tributylvinyl tin (8.5 L, 0.029 mmol, 1.5 eq) in dry DMF (0.4 cm3) under nitrogen. After complete addition the colour of the reaction mixture turned instantaneously from orange to black, and, after 5 min. the reaction was deemed complete by TLC analysis.

The reaction was quenched by the addition of ammonia solution (10%; 2 cm3) and diluted with hexane (2 cm3) followed by vigorous stirring overnight. The organic layer was separated and the aqueous layer was further extracted with hexane (2  4 cm3). The organic phases were washed with H2O (2  4 cm3) then brine (2  4 cm3), dried (MgSO4) and concentrated *in vacuo*. Purification *via* flash column chromatography (6:1 hexane:ether; 1% NEt3) yielded the *(Z)-diene* **13** (6.8 mg, 80%) as a colourless oil; R*f* 0.49 (4:1 hexane:EtOAc); -20.0 (*c* 0.15 in CHCl3); *v*max(thin film)/cm-1 2940s (C-H), 2864s (C-H), 2145w (CC), 1461m, 1004m, 950m and 921m; **H(500 MHz; CDCl3) 6.68 (1 H, ddd, *J* 17.0, 10.5 and 10.5, *H*-15), 6.08 (1 H, dd, *J* 11.0 and 10.5, *H*-14), 6.05 (1 H, dd, *J* 10.5 and 10.0, C*H*=CHCC), 5.76 (1 H, d, *J* 10.5, CH=C*H*CC), 5.44 (1 H, ddd, *J* 11.0, 9.0 and 9.0, *H*-13), 5.18 (1 H, d, *J* 17.0, *H*-16 *trans*), 5.09 (1 H, d, *J* 10.5, *H*-16 *cis*), 4.54 (1 H, ddd, *J* 6.5, 6.0 and 0.0, C*H*O), 3.97 (1 H, dd, *J* 10.0 and 6.5, C*H*CH=CH), 2.82-2.76 (2 H, m, C*H*N and C*H*HCH=CH), 2.27 (1 H, ddd, *J* 14.0, 9.0 and 9.0, CH*H*CH=CH), 2.09-1.98 (1 H, m, C*H*), 1.78 (1 H, dm, *J* 13.5, C*H*), 1.70 (1 H, dm, *J* 13.5, C*H*), 1.60-0.82 (9 H, m, 4  C*H*2 and C*H*) and 1.09 (21 H, s, Si(*i*Pr)3); **C(100 MHz; CDCl3) 138.6 (d), 132.6 (d), 131.0 (d), 129.4 (d), 117.1 (t), 113.6 (d), 103.4 (s), 96.5 (s), 77.8 (d), 65.7 (s), 64.7 (d), 46.4 (d), 34.5 (t), 33.0 (t), 32.6 (t), 29.8 (t), 25.4 (t), 19.6 (t), 18.6 (q), 18.0 (t) and 11.3 (d); *m/z* (ES) 440.3348 [(M+H)+.C28H46NOSi requires *M*, 440.3348]; *m/z* (CI) 440 [(M+H)+, 13%], 372 (56), 174 (100) and 150 (43).

**(2*S*, 6*R*, 7*S*, 8*S*)-2-(2'-Oxo-ethyl)-7-(2"-iodoethenyl)-1-aza-12-oxatricyclo[5.4.16,8.0] undecane, 22.**

Dry recrystallised phosphonium salt(215.0 mg, 0.41 mmol) was suspended in degassed THF (2.0 cm3) under argon and cooled to -30 °C. KHMDS (0.5 M in toluene; 780 µL, 0.39 mmol, 0.96 eq) was added dropwise with rapid stirring and the solution was stirred at -30 °C for 0.5 h. The solution was cooled further to -78 °C and stirring stopped allowing the salts to settle.

The bis-aldehyde **21** (7.7 mg, 0.032 mmol) was dissolved in degassed THF (1.5 cm3) and cooled to -78 °C under argon. The supernatant from the ylide formation (334 µL, 0.048 mmol, 1.5 eq) was added quickly and the reaction mixture was stirred for a further 0.5 h.

The reaction was quenched by the addition of wet THF (1:1 THF:H2O; 2 cm3) and warmed to 25 °C. Ether (4 cm3) and satd. NH4Cl (4 cm3) were added and the organic layer separated. The aqueous layer was further extracted with ether (3  4 cm3) and the organic phases were combined, dried (MgSO4) and concentrated *in vacuo*. Purification *via* flash column chromatography (3:1 hexane:ether) yielded the *bis*-vinyl iodide (1.5 mg, 10%)followed bythe*mono-vinyl iodide* **22** (7.0 mg, 60%) as a colourless oil; R*f*0.32 (1:1 hexane:EtOAc); -62.9 (*c* 0.31 in CHCl3); *v*max(CHCl3)/cm-1 2941s (C-H), 2874s (C-H), 1722s (C=O), 1220m, 1210s and 926w; **H(250 MHz; CDCl3) 9.88 (1 H, t, *J* 2.5, C*H*O), 6.55 (1 H, d, *J* 7.5, =C*H*I), 6.35 (1 H, dd, *J* 9.0 and 7.5, C*H*=CHI), 4.54 (1 H, ddd, *J* 5.5, 5.5 and 0.0, C*H*O ring), 3.56 (1 H, m, C*H*CH=CHI), 3.42-3.30 (1 H, dddd, *J* 12.0, 6.0, 5.0 an 2.5, C*H*N), 2.88 (1 H, ddd, *J* 16.0, 5.0 and 2.5, CH*H*CHO), 2.53 (1 H, ddd, *J* 16.0, 6.0 and 2.5, C*H*HCHO) and 2.05-1.21 (12 H, m, 6  C*H*2); **C(63 MHz, APT; CDCl3) 202.6 (d), 136.1 (d), 86.5 (d), 77.0 (d), 65.4 (s), 60.7 (d), 50.7 (d), 49.6 (t), 35.0 (t), 32.1 (t), 31.0 (t), 25.7 (t), 20.1 (t) and 17.8 (t); *m/z* (EI) 361.0546 [M+.C14H20O2NI requires *M*, 361.0539]; *m/z* (CI) 362 [(M+H)+, 80%], 235 (81), 192 (46) and 176 (100).

**(–)-Histrionicotoxin 259A Hydrochloride, 25.**

Triisopropylsilylhistrionicotoxin **259A** (6.6 mg, 0.016 mmol) was dissolved in THF (3 cm3) and a solution of TBAF (1.0 M in THF; 32 L, 0.032 mmol, 2 eq) was added with stirring. After the reaction mixture was stirred at 25 °C for 0.75 h the reaction was deemed complete as judged by TLC analysis. The reaction mixture was concentrated under a stream of nitrogen and purified *via* flash column chromatography (1:9 MeOH:CH2Cl2) to furnish *(–)-histrionicotoxin* ***259A* 3** as a colourless oil; R*f*0.28 (1:9 MeOH:CH2Cl2); **H(500 MHz; CDCl3) 5.83 (1 H, dd, *J* 10.5 and 10.5, *H*-15), 5.83-5.75 (1 H, m, *H*-13), 5.62 (1 H, d, *J* 10.5, *H*-16), 5.25 (1 H, d, *J* 17.5, *H*-14 *trans*), 5.15 (1 H, d, *J* 10.0, *H*-14 *cis*), 3.97 (1 H, br s, C*H*OH), 3.71 (1 H, d, *J* 10.0, C*H*NH), 3.22 (2 H, br m, *H*-7 and *H*-18), 2.50-2.33 (2 H, br m, *H*-12  2), 2.09-2.00 (2 H, m, C*H*2) and 1.80-0.80 (10 H, m, 5  C*H*2).

(–)-Histrionicotoxin **259A** **3** was dissolved in dry methanol (1 cm3) and a solution of methanolic HCl (0.3 M; 54 L, 1 eq) was added. After the mixture was stirred for 0.5 h, the solvent was removed *in vacuo* furnishing *(–)-histrionicotoxin* ***259A*** **25** (3.9 mg, 82%) as a colourless oil; R*f*0.28 (1:9 MeOH:CH2Cl2); -54.0 (*c* 0.2 in EtOH); **H(500 MHz; MeOH) 6.00 (1 H, dd, *J* 10.5 and 10.5, *H*-15), 5.85-5.75 (1 H, m, *H*-13), 5.78 (1 H, d, *J* 10.5, *H*-16), 5.27 (1 H, d, *J* 15.5, *H*-14 *trans*), 5.25 (1 H, d, *J* 8.0, *H*-14 *cis*), 3.99 (1 H, s, C*H*OH), 3.78 (1 H, s, *H*-18), 3.63 (1 H, m, *H*-7), 3.55-3.49 (1 H, br m, C*H*NH), 2.55-2.49 (1 H, m, *H*-12), 2.34 (1 H, ddd, *J* 14.0, 9.0 and 9.0, *H*-12), 2.04-1.87 (3 H, m, C*H*2 and C*H*), 1.76-1.68 (6 H, m, 3  C*H*2) and 1.37-1.29 (3 H, m, C*H*2 and C*H*); **C(100 MHz; MeOH) 137.8, 132.0, 119.3, 112.7, 84.5, 78.6, 70.0, 59.9, 51.4, 40.8, 38.3, 33.9, 32.4, 28.2, 26.8, 17.4 and 14.0; *m/z* (ES) 260.2015 [(M-HCl+H)+.C17H26NOCl requires *M*, 260.2014]; *m/z* (CI) 260 [(M-HCl+H)+, 100%], 186 (52).

**References**

1 J. W. Daly, *Prog. Chem. Org. Nat. Prod.*, 1982, **41**, 247 and references therein.

2 H. Takahashi, B. Witkop, A. Brossi, M. A. Maleque, and E. X. Albuquerque, *Helv. Chim. Acta*, 1982, **65**, 252.

3 T. Tokuyama, K. Uenoyama, G. Brown, J. W. Daly, and B. Witkop, *Helv. Chim. Acta*, 1974, **57**, 2597.

4 T. Tokuyama, J. Yamamoto, J. W. Daly, and R. J. Highet, *Tetrahedron*, 1983, **39, 1**, 49.
